# Supplementary material for: Molecular recognition on fluidic lipid bilayer microarray corralled by well-defined polymer brushes
Source: Royal Society of Chemistry journal article supplement (doi:10.1039/c0sm00086h), 2010-01-01
Supplement: c0sm00086h.pdf [file c0sm00086h.pdf]

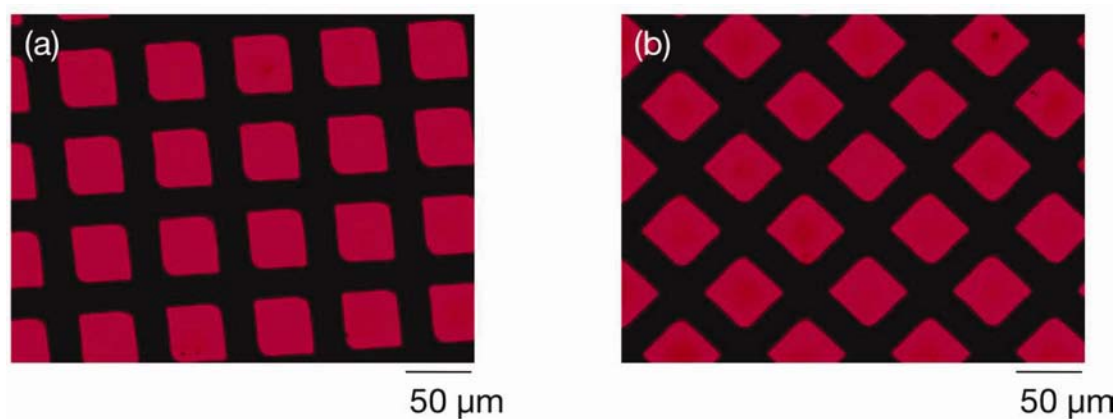

Fig. S1 Fluorescence micrographs of 1,2-Dioleoyl-sn-glycero-3-phosphorylcholine bilayer microarrays containing 1.0 mol % Texas Red<sup>®</sup>1,2-dihexadecanoyl-sn-glycero-3-phosphoethanolamine, triethylammonium salt; (a) just after preparation, (b) after immersion in human plasma for 3 h.
